# Supplementary material for: Predictors of Poststroke Aphasia Recovery: A Systematic Review-Informed Individual Participant Data Meta-Analysis
Source: PubMed Central journal article supplement (PMC8078126; doi:10.1161/strokeaha.120.031162), 2021-03-15
Supplement: str-52-1778-s001.pdf [file str-52-1778-s001.pdf]

## Supplemental Materials

### Demographics of post-stroke aphasia recovery: a systematic review-informed individual participant data (IPD) meta-analysis

#### Supplement 1) Table I: Standardised measures for each language domain

| Language domain          | Standardised Measurement                                   | Range                                 |
|--------------------------|------------------------------------------------------------|---------------------------------------|
| Overall Language Ability | Western Aphasia Battery<br>(Aphasia Quotient)              | 0-100                                 |
| Auditory Comprehension   | Aachen Aphasia Test Token<br>Test                          | 0-50 (reflecting positive<br>scoring) |
| Naming                   | Boston Naming Test                                         | 0-60                                  |
| Reading                  | Reading subtest of the<br>Comprehensive Aphasia Test       | 0-74                                  |
| Writing                  | Writing subtest of the<br>Comprehensive Aphasia Test       | 0-76                                  |
| Other Spoken Language    | Porch Index of<br>Communicative Ability                    | 0-16                                  |
| Functional Communication | Aachen Aphasia Test<br>Spontaneous Communication<br>domain | 0-5                                   |

Supplement 2) Table II: Participant Demography

| Parameter                                    |                  | Language Domain                   |                                  |                 |                                   |
|----------------------------------------------|------------------|-----------------------------------|----------------------------------|-----------------|-----------------------------------|
|                                              |                  | Overall language ability<br>N=943 | Auditory comprehension<br>N=1056 | Naming<br>N=791 | Functional Communication<br>N=974 |
| <b>Age, years (median, IQR)</b>              |                  | 63 (53-73),<br>n=914              | 61 (51-69),<br>n=1046            | 61 (52-69)      | 67 (57-77)                        |
| <b>By age group</b>                          | ≤55 years        | 281                               | 360 (34%)                        | 269             | 208 (21)                          |
|                                              | 56-65 years      | (31%)                             | 322 (31%)                        | (34%)           | 228 (23)                          |
|                                              | 66-75 years      | 248                               | 231 (22%)                        | 245             | 267 (27)                          |
|                                              | >75 years        | (27%)                             | 133 (13%)                        | (31%)           | 271 (28)                          |
|                                              | Missing          | 195                               | 10                               | 190             | 0                                 |
|                                              |                  | (21%)                             |                                  | (24%)           |                                   |
|                                              |                  | 190                               |                                  | 87              |                                   |
|                                              |                  | (21%)                             |                                  | (11%)           |                                   |
|                                              |                  | 29                                |                                  | 0               |                                   |
| <b>Time since stroke, days (median, IQR)</b> |                  | 36 (7-548),<br>n=940              | 116 (18-883),<br>n=1046          | 131 (30-883)    | 28 (6-244),<br>n=962              |
| <b>By Time group</b>                         | 0-28 days        | 442                               | 339 (32%)                        | 194             | 501 (52)                          |
|                                              | 4 weeks-3 months | (47%)                             | 151 (14%)                        | (25%)           | 129 (13)                          |
|                                              | 3-6 months       | 107                               | 97 (9%)                          | 143             | 69 (7)                            |
|                                              | >6 months        | (11%)                             | 459 (44%)                        | (18%)           | 263 (27)                          |
|                                              | Missing          | 59 (6%)                           | 10                               | 106             | 12                                |
|                                              |                  | 332                               |                                  | (13%)           |                                   |
|                                              |                  | (35%)                             |                                  | 348             |                                   |
|                                              |                  | 3                                 |                                  | (44%)           |                                   |
|                                              |                  |                                   |                                  | 0               |                                   |
| <b>Sex</b>                                   | Female           | 360                               | 385 (37%)                        | 278             | 417 (43)                          |
|                                              | Male             | (40%)                             | 660 (63%)                        | (36%)           | 557 (57)                          |
|                                              | Missing          | 544                               | 11                               | 502             | 0                                 |
|                                              |                  | (60%)                             |                                  | (64%)           |                                   |
|                                              |                  | 39                                |                                  | 11              |                                   |
| <b>Ethnicity</b>                             | Asian            | 24 (2.5%)                         | 22 (2%)                          | 0               | 0                                 |
|                                              | Black            | 0                                 | 4 (0.4%)                         | 5 (0.6%)        | 5 (0.5)                           |
|                                              | White            | 25 (2.5%)                         | 71 (7%)                          | 72 (9%)         | 80 (8)                            |
|                                              | Not specified    | 894                               | 959 (91%)                        | 714             | 889 (91)                          |
|                                              |                  | (95%)                             |                                  | (90%)           |                                   |
| <b>Handed</b>                                | Right            | 616                               | 852 (95%)                        | 586             | 536 (94)                          |
|                                              | Left             | (95%)                             | 37 (4%)                          | (94%)           | 24 (4)                            |
|                                              | Ambidextrous     | 25 (5%)                           | 12 (1%)                          | 29 (5%)         | 10 (2)                            |
|                                              | Missing          | 7 (1%)                            | 155                              | 8 (1%)          | 404                               |
|                                              |                  | 295                               |                                  | 168             |                                   |
| <b>Hemisphere</b>                            | Left             | 627                               | 725 (90%)                        | 618             | 645 (98)                          |
|                                              | Right            | (90%)                             | 61 (8%)                          | (89%)           | 11 (2)                            |
|                                              | Bilateral        | 55 (8%)                           | 20 (2%)                          | 59 (9%)         | 5 (0.7)                           |

|                       |                    |                    |                      |                             |                      |
|-----------------------|--------------------|--------------------|----------------------|-----------------------------|----------------------|
|                       | Missing            | 18 (3%)<br>243     | 250                  | 16 (2%)<br>98               | 313                  |
| <b>Type</b>           | ICH                | 90 (10%)           | 128 (12%)            | 76                          | 70 (7                |
|                       | Ischaemic          | 628                | 671 (64%)            | (10%)                       | 704 (74              |
|                       | Mixed              | (68%)              | 0                    | 502                         | 0                    |
|                       | SAH                | 29 (3%)            | 15 (1%)              | (64%)                       | 9 (1                 |
|                       | Unclassified       | 14 (1.5%)          | 227 (22%)            | 0                           | 164 (17              |
|                       | Missing            | 162<br>(18%)<br>20 | 15                   | 8 (1%)<br>201<br>(26%)<br>4 | 19                   |
| <b>Living context</b> | Alone              | 55 (34%)           | 19 (18%)             | 23                          | 86 (34               |
|                       | Formal care        | 7 (4%)             | 30 (29%)             | (21%)                       | 30 (12               |
|                       | Living with others | 102<br>(62%)       | 55 (53%)<br>952      | 30<br>(27%)                 | 136 (54<br>721       |
|                       | Missing            | 776                |                      | 58<br>(52%)<br>680          |                      |
|                       | <b>Language</b>    | Arabic             | 29 (3%)              | 0                           | 0                    |
| Danish                |                    | 19 (2%)            | 0                    | 0                           | 19 (2%)              |
| Dutch                 |                    | 0                  | 292 (28%)            | 172                         | 171 (18%)            |
| English               |                    | 329<br>(35%)       | 278 (26%)<br>31 (3%) | (22%)<br>309                | 357 (37%)<br>23 (2%) |
| Finnish               |                    | 36 (4%)            | 0                    | (39%)                       | 0                    |
| French                |                    | 99 (11%)           | 175 (17%)            | 36 (5%)                     | 112 (12%)            |
| German                |                    | 128<br>(14%)       | 0<br>115 (11%)       | 0<br>42 (5%)                | 0<br>0               |
| Greek                 |                    | 0                  | 58 (5%)              | 38 (5%)                     | 0                    |
| Italian               |                    | 0                  | 21 (2%)              | 50 (6%)                     | 0                    |
| Japanese              |                    | 24 (3%)            | 39 (4%)              | 36 (5%)                     | 0                    |
| Korean                |                    | 21 (2%)            | 25 (2%)              | 21 (3%)                     | 23 (2%)              |
| Norwegian             |                    | 39 (4%)            | 0                    | 39 (5%)                     | 0                    |
| Portuguese            |                    | 25 (3%)            | 22 (2%)              | 25 (3%)                     | 231 (24%)            |
| Spanish               |                    | 0                  |                      | 10 (1%)                     |                      |
| Swedish               |                    | 194<br>(21%)       |                      | 13 (2%)                     |                      |

**Supplement 3) Figure I: Transformed language domain scores, stratified by contributing assessment tool**

**a) Overall-language-ability**

**Overall Language Ability: Standardised scores stratified by assessment tools used**

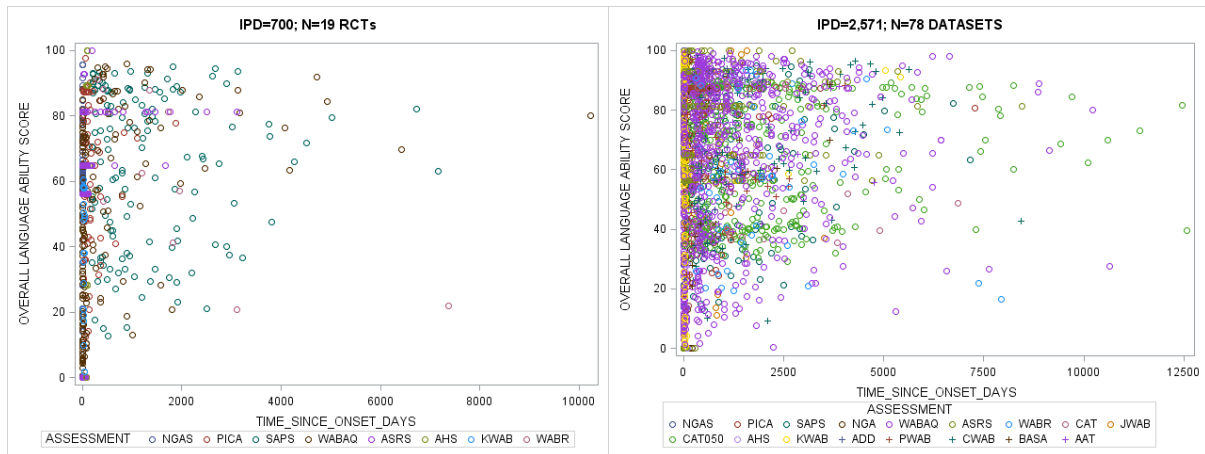

**b) Auditory comprehension**

**Auditory comprehension: Standardised scores stratified by assessment tools used**

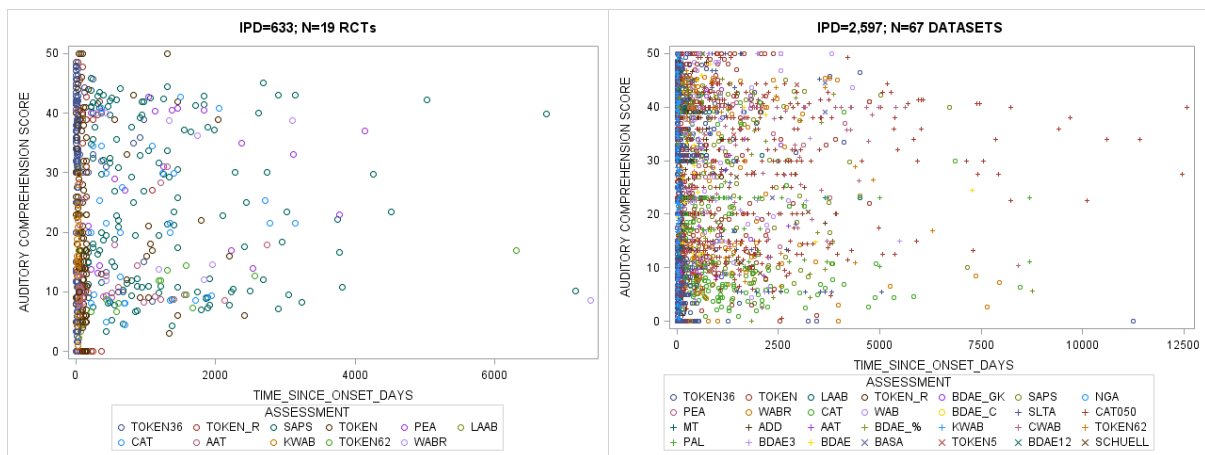

### c) Naming

Naming: Standardised scores stratified by assessment tools used

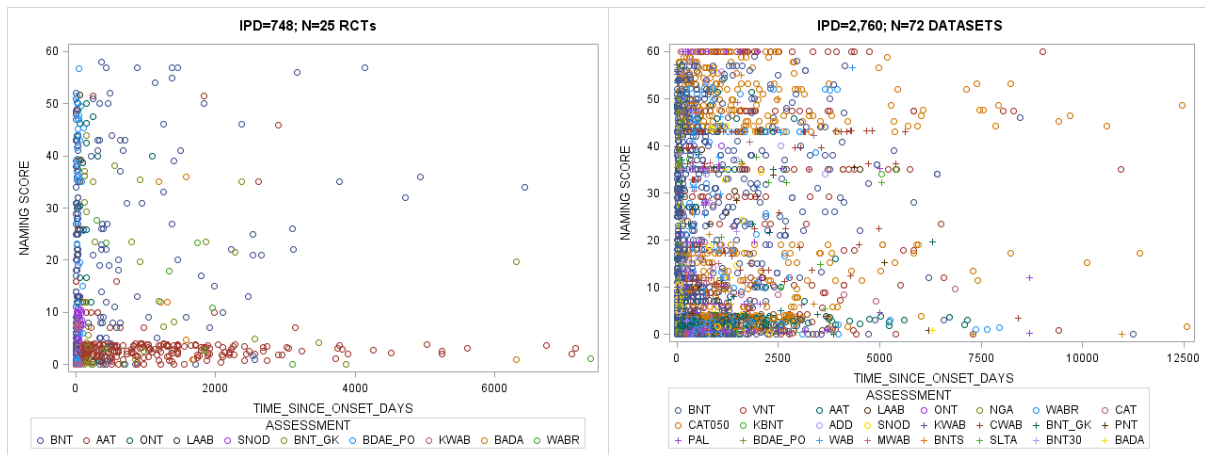

### d) Functional communication: observer-rated activity

Functional Communication: Standardised scores stratified by assessment tools used

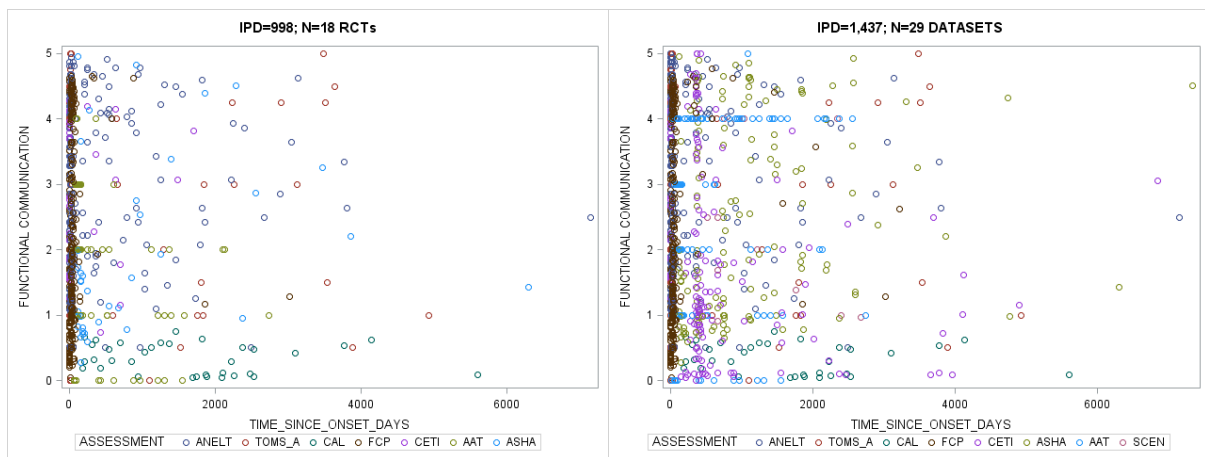

The spread of data points overlapped, with no clustering of transformed scores from contributing assessment tools. The transformed values generated by each of the assessment tools were therefore considered to be valid and fell within an expected range.

**Supplement 4a) Table III: Associations between demographic factors and overall language ability (WAB-AQ)**

| <b>Variable</b>     | <b>RCTs</b> | <b>IPD*</b> | <b>Estimate<br/>of means</b> | <b>Lower<br/>Quartile</b> | <b>Upper<br/>Quartile</b> | <b>All<br/>Studies<br/>Designs</b> | <b>IPD</b> | <b>Estimate<br/>of means</b> | <b>Lower<br/>Quartile</b> | <b>Upper<br/>Quartile</b> |
|---------------------|-------------|-------------|------------------------------|---------------------------|---------------------------|------------------------------------|------------|------------------------------|---------------------------|---------------------------|
| <b>Female</b>       | 11          | 206         | 14.25                        | 9.01                      | 19.50                     | 16                                 | 250        | 14.15                        | 9.66                      | 18.65                     |
| <b>Male</b>         | 11          | 276         | 12.30                        | 7.16                      | 17.44                     | 17                                 | 378        | 12.17                        | 7.89                      | 16.46                     |
| <b>&lt;55 years</b> | 11          | 136         | 15.43                        | 9.95                      | 20.91                     | 17                                 | 192        | 16.51                        | 10.03                     | 22.99                     |
| <b>56-65 years</b>  | 11          | 141         | 12.36                        | 6.90                      | 17.82                     | 16                                 | 178        | 12.88                        | 6.38                      | 19.38                     |
| <b>66-75</b>        | 10          | 96          | 11.49                        | 5.73                      | 17.25                     | 14                                 | 123        | 13.22                        | 6.69                      | 19.75                     |
| <b>&gt;75</b>       | 7           | 109         | 13.81                        | 7.82                      | 19.81                     | 9                                  | 135        | 13.83                        | 6.94                      | 20.73                     |
| <b>0-28 days</b>    | 8           | 260         | 19.14                        | 13.89                     | 24.39                     | 9                                  | 335        | 20.99                        | 13.78                     | 28.20                     |
| <b>1-3 months</b>   | 6           | 64          | 16.17                        | 10.20                     | 22.13                     | 8                                  | 71         | 16.44                        | 9.02                      | 23.86                     |
| <b>3-6 months</b>   | 3           | 16          | 9.60                         | 0.07                      | 19.14                     | 5                                  | 19         | 9.58                         | -0.07                     | 19.22                     |
| <b>&gt;6 months</b> | 4           | 142         | 8.19                         | -0.12                     | 16.50                     | 8                                  | 203        | 9.44                         | 2.81                      | 16.07                     |
|                     |             |             |                              |                           | Random (no)               | 6                                  | 146        | 14.17                        | 7.36                      | 20.99                     |
|                     |             |             |                              |                           | Random<br>(yes)           | 11                                 | 482        | 12.37                        | 7.70                      | 17.04                     |

\*Individual participant data

**Supplement 4b) Table IV: Associations between demographic factors and auditory comprehension (AAT-TT)**

| <b>Variable</b>     | <b>RCTs</b> | <b>IPD*</b> | <b>Estimate<br/>of means</b> | <b>Lower<br/>Quartile</b> | <b>Upper<br/>Quartile</b> | <b>All Study<br/>Designs</b> | <b>IPD</b> | <b>Estimate<br/>of means</b> | <b>Lower<br/>Quartile</b> | <b>Upper<br/>Quartile</b> |
|---------------------|-------------|-------------|------------------------------|---------------------------|---------------------------|------------------------------|------------|------------------------------|---------------------------|---------------------------|
| <b>Female</b>       | 16          | 211         | 3.82                         | 0.98                      | 6.66                      | 22                           | 239        | 4.92                         | 2.15                      | 7.70                      |
| <b>Male</b>         | 16          | 329         | 3.10                         | 0.35                      | 5.85                      | 21                           | 402        | 4.35                         | 1.65                      | 7.04                      |
| <b>&lt;55 years</b> | 16          | 178         | 6.05                         | 3.16                      | 8.94                      | 22                           | 232        | 7.05                         | 4.32                      | 9.77                      |
| <b>56-65 years</b>  | 16          | 182         | 2.83                         | -0.04                     | 5.71                      | 22                           | 212        | 4.31                         | 1.52                      | 7.09                      |
| <b>66-75</b>        | 15          | 116         | 3.50                         | 0.46                      | 6.53                      | 19                           | 131        | 4.61                         | 1.65                      | 7.58                      |
| <b>&gt;75</b>       | 12          | 64          | 1.46                         | -1.90                     | 4.82                      | 14                           | 66         | 2.57                         | -0.74                     | 5.88                      |
| <b>0-28 days</b>    | 6           | 139         | 5.25                         | 1.69                      | 8.82                      | 6                            | 139        | 6.33                         | 2.57                      | 10.08                     |
| <b>1-3 months</b>   | 9           | 97          | 4.27                         | 1.07                      | 7.47                      | 10                           | 106        | 5.16                         | 1.99                      | 8.34                      |
| <b>3-6 months</b>   | 6           | 61          | 2.88                         | -1.81                     | 7.56                      | 8                            | 65         | 4.32                         | 0.04                      | 8.60                      |
| <b>&gt;6 months</b> | 9           | 243         | 1.44                         | -1.85                     | 4.72                      | 15                           | 331        | 2.73                         | 0.12                      | 5.34                      |
|                     |             |             |                              |                           | Random (no)               | 5                            | 101        | 6.11                         | 1.65                      | 10.57                     |
|                     |             |             |                              |                           | Random<br>(yes)           | 16                           | 540        | 3.16                         | 0.67                      | 5.65                      |

\*Individual participant data

**Supplement 4c) Table V: Associations between demographic factors and naming (BNT)**

| <b>Variable</b>     | <b>RCTs</b> | <b>IPD*</b> | <b>Estimate<br/>of means</b> | <b>Lower<br/>Quartile</b> | <b>Upper<br/>Quartile</b> | <b>All Study<br/>Designs</b> | <b>IPD</b> | <b>Estimate<br/>of means</b> | <b>Lower<br/>Quartile</b> | <b>Upper<br/>Quartile</b> |
|---------------------|-------------|-------------|------------------------------|---------------------------|---------------------------|------------------------------|------------|------------------------------|---------------------------|---------------------------|
| <b>Female</b>       | 13          | 165         | 6.92                         | 2.47                      | 11.36                     | 21                           | 219        | 7.54                         | 3.84                      | 11.23                     |
| <b>Male</b>         | 13          | 220         | 6.70                         | 2.33                      | 11.07                     | 21                           | 333        | 7.73                         | 4.10                      | 11.36                     |
| <b>&lt;55 years</b> | 13          | 103         | 9.31                         | 4.71                      | 13.90                     | 21                           | 181        | 9.72                         | 6.00                      | 13.44                     |
| <b>56-65 years</b>  | 13          | 124         | 7.34                         | 2.79                      | 11.90                     | 21                           | 169        | 8.08                         | 4.30                      | 11.87                     |
| <b>66-75</b>        | 12          | 97          | 6.16                         | 1.48                      | 10.84                     | 18                           | 134        | 7.35                         | 3.48                      | 11.22                     |
| <b>&gt;75</b>       | 11          | 61          | 4.42                         | -0.56                     | 9.40                      | 15                           | 68         | 5.38                         | 1.11                      | 9.66                      |
| <b>0-28 days</b>    | 5           | 129         | 11.12                        | 5.71                      | 16.54                     | 6                            | 138        | 11.35                        | 6.62                      | 16.09                     |
| <b>1-3 months</b>   | 8           | 93          | 7.74                         | 2.89                      | 12.59                     | 10                           | 116        | 8.70                         | 4.56                      | 12.84                     |
| <b>3-6 months</b>   | 6           | 70          | 4.26                         | -1.58                     | 10.10                     | 9                            | 92         | 5.70                         | 1.17                      | 10.23                     |
| <b>&gt;6 months</b> | 7           | 93          | 4.11                         | -1.08                     | 9.29                      | 15                           | 206        | 4.78                         | 1.08                      | 8.48                      |
|                     |             |             |                              |                           | Random (no)               | 8                            | 167        | 8.56                         | 2.88                      | 14.24                     |
|                     |             |             |                              |                           | Random<br>(yes)           | 13                           | 385        | 6.71                         | 2.57                      | 10.85                     |

\*Individual participant data



Supplement 4d) Table VI: Associations between demographic factors and functional communication (AAT-SC)

| Variable    | RCTs | IPD* | Estimate<br>of means | Lower<br>Quartile | Upper<br>Quartile | All<br>Study<br>Designs | IP<br>D | Estimate<br>of means | Lower Quartile | Upper<br>Quartile |
|-------------|------|------|----------------------|-------------------|-------------------|-------------------------|---------|----------------------|----------------|-------------------|
| Female      | 14   | 236  | 0.76                 | 0.48              | 1.03              | 18                      | 275     | 0.69                 | 0.40           | 0.98              |
| Male        | 14   | 296  | 0.57                 | 0.30              | 0.84              | 19                      | 372     | 0.54                 | 0.26           | 0.83              |
| <55 years   | 14   | 147  | 0.75                 | 0.46              | 1.04              | 19                      | 181     | 0.69                 | 0.39           | 0.99              |
| 56-65 years | 13   | 145  | 0.70                 | 0.41              | 1.00              | 18                      | 170     | 0.66                 | 0.36           | 0.96              |
| 66-75       | 14   | 121  | 0.55                 | 0.25              | 0.85              | 18                      | 148     | 0.52                 | 0.21           | 0.82              |
| >75         | 12   | 119  | 0.65                 | 0.34              | 0.96              | 15                      | 148     | 0.61                 | 0.30           | 0.92              |
| 0-28 days   | 6    | 232  | 1.05                 | 0.70              | 1.40              | 7                       | 277     | 0.97                 | 0.61           | 1.34              |
| 1-3 months  | 5    | 68   | 0.87                 | 0.51              | 1.23              | 6                       | 70      | 0.83                 | 0.46           | 1.21              |
| 3-6 months  | 4    | 62   | 0.40                 | -0.06             | 0.87              | 5                       | 63      | 0.37                 | -0.10          | 0.83              |
| >6 months   | 7    | 170  | 0.33                 | 0.00              | 0.66              | 11                      | 237     | 0.30                 | 0.01           | 0.60              |
|             |      |      |                      |                   | Random<br>(no)    | 5                       | 115     | 0.57                 | 0.11           | 1.03              |
|             |      |      |                      |                   | Random<br>(yes)   | 14                      | 532     | 0.67                 | 0.41           | 0.94              |

\*Individual participant data

**Supplement 5) Figure II: Absolute and Relative Proportion of Change from Baseline in Language Domain Scores across All Study Designs**

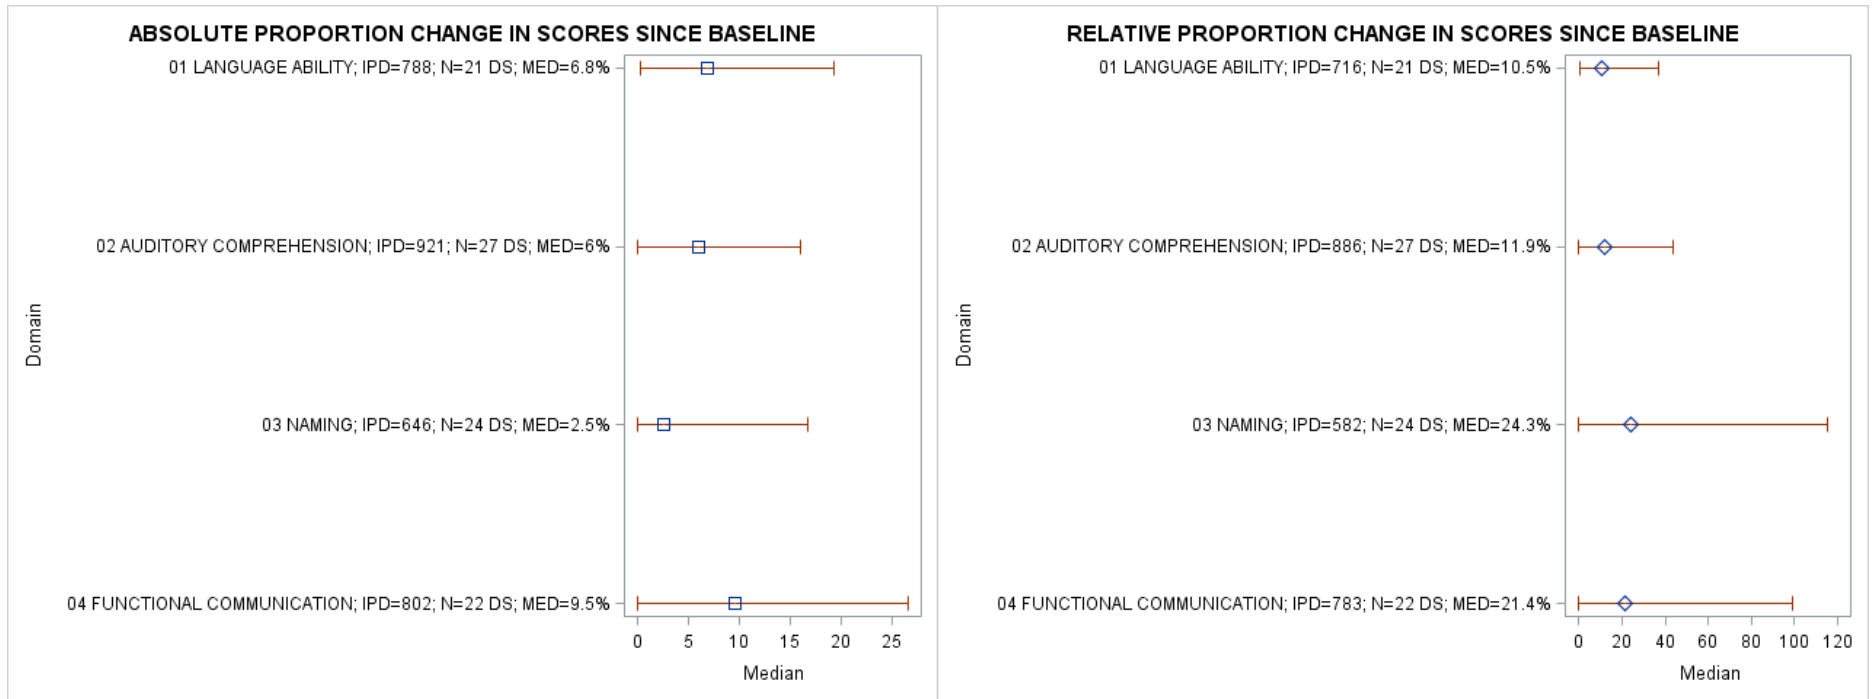

Key: IPD= Individual Participant Data; N=number of datasets; MED=median proportion of recovery
